# Supplementary material for: Development of novel Escherichia coli cell-based biosensors to monitor Mn(II) in environmental systems
Source: Front Microbiol. 2022 Dec 19;13:1051926. doi: 10.3389/fmicb.2022.1051926 (PMC9806134; doi:10.3389/fmicb.2022.1051926)

*Supplementary Data for:*

Development of novel *Escherichia coli* cell-based biosensors to monitor Mn(II) in environmental systems

**Yangwon Jeon1, Yejin Lee1, Yeunhong Kim1, Chanhee Park1, Hoon Choi2, Geupil Jang3*, Youngdae Yoon**1*

1Department of Environmental Health Science, Konkuk University, Seoul 05029, Republic of Korea

2Department of Life and Environmental Sciences, Wonkwang University, Iksan 54538, Republic of Korea.

3School of Biological Sciences and Technology, Chonnam National University, Gwangju 61186, Republic of Korea

*** Correspondence:**Geupil Jang
yk3@chonnam.ac.kr

Youngdae Yoon
yyoon21@gmail.com

Keywords: *E. coli*-based biosensor, Mn(II) monitoring, MntR transcription factor, *mnt*-operon

**Table S1. The lists of primers used for plasmid construction**

| **Name** | **Sequence (5’-3’)** |  |
| --- | --- | --- |
| mntP promoter  mntP-ribo  mntS promoter  mntH promoter  MntR  MntR K73L  MntR R77L  MntR H135A | AT*AGATCT*GGCTGTTAATCCGCGTTC  AA*TCTAGA*AAAACACATCATCGCCCC  AT*AGATCT*GGCTGTTAATCCGCGTTC  AA*TCTAGA*AAATGAGGGCGCAACCTT  AC*AGATCT*TCGTGCGCACATTGTAAAC  CC*TCTAGA*TCCTTGAGGGATGATTGCAT  CC*AGATCT*TCAGAGAAATCACCACAATC  CC*TCTAGA*GCCTCTAAAACATAGCCTTT  AT*CATATG*AGTCGTCGCGCAGGTAC  TA*CTCGAG*TCATTTGGCACCGTGTT  CAACCGACGGTGGCTCTAATGCTTAAGCGGC  GCCGCTTAAGCATTAGAGCCACCGTCGGTTG  CTAAAATGCTTAAGCTGCTGGCAACCATGG  CCATGGTTGCCAGCAGCTTAAGCATTTTAG  GCGGAAGGCATGGAGGCGCATGTTAGTGAAGAG  CGCCTTCCGTACCTCCGCGTACAATCACTTCTC | forward  reverse  forward  reverse  forward  reverse  forward  reverse  forward  reverse  site-directed mutagenesis  site-directed mutagenesis  site-directed mutagenesis |

* The underlined letters on primer sequences were indicated the restriction enzyme sites.

**Figure S1. The effects of MntR in *E. coli* cell-based biosensors.** The biosensor strains on LB agar plates were illuminated under UV light. (A) *E. coli* WT with pMntS-eGFP, (B) *E. coli-mntR* with pMntS-eGFP, (C) *E. coli-mntR* with pMntS-eGFP and pCDF-MntR WT


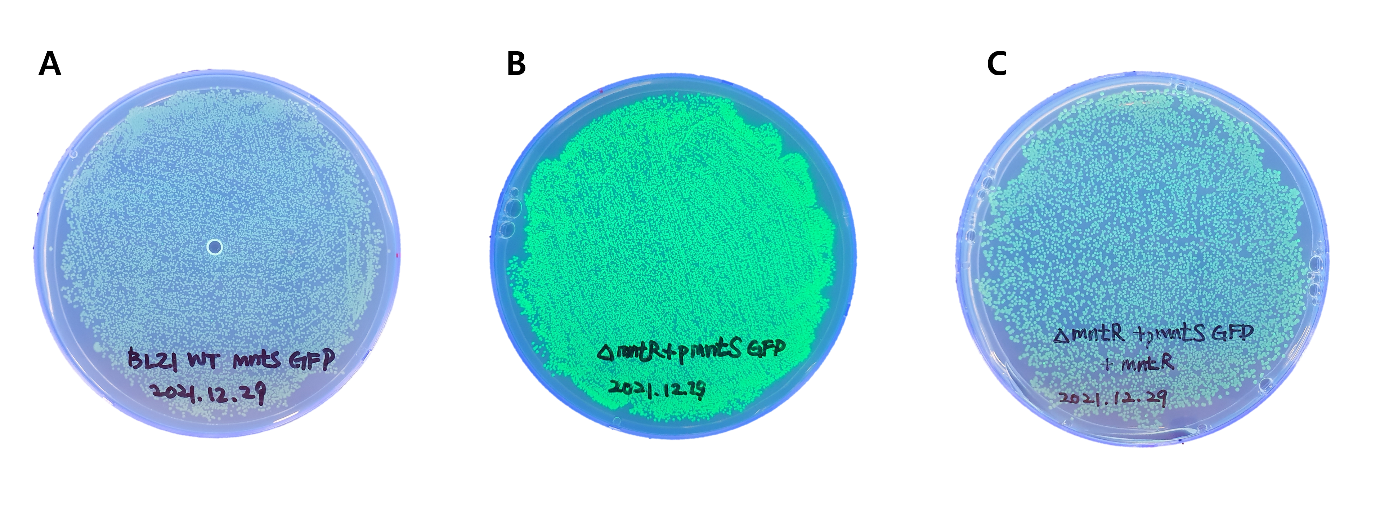

Supplement: Supplementary file 1 [file Data_Sheet_1.docx]
